# Supplementary material
Source: publisher figshare collection journal article supplement (https://acs.figshare.com/ndownloader/files/5116402)
Supplement: Supplementary file 1 [file 5116402]

  
data_cd2544 
  
_audit_creation_method            SHELXL-97 
_chemical_name_systematic 
; 
 ? 
; 
_chemical_name_common             ? 
_chemical_melting_point           ? 
_chemical_formula_moiety          ? 
_chemical_formula_sum 
 'C20 H21 N O5 S' 
_chemical_formula_weight          387.44 
  
loop_ 
 _atom_type_symbol 
 _atom_type_description 
 _atom_type_scat_dispersion_real 
 _atom_type_scat_dispersion_imag 
 _atom_type_scat_source 
 'C'  'C'   0.0033   0.0016 
 'International Tables Vol C Tables 4.2.6.8 and 6.1.1.4' 
 'H'  'H'   0.0000   0.0000 
 'International Tables Vol C Tables 4.2.6.8 and 6.1.1.4' 
 'N'  'N'   0.0061   0.0033 
 'International Tables Vol C Tables 4.2.6.8 and 6.1.1.4' 
 'O'  'O'   0.0106   0.0060 
 'International Tables Vol C Tables 4.2.6.8 and 6.1.1.4' 
 'S'  'S'   0.1246   0.1234 
 'International Tables Vol C Tables 4.2.6.8 and 6.1.1.4' 
  
_symmetry_cell_setting            Monoclinic 
_symmetry_space_group_name_H-M    P2(1)/c 
  
loop_ 
 _symmetry_equiv_pos_as_xyz 
 'x, y, z' 
 '-x, y+1/2, -z+1/2' 
 '-x, -y, -z' 
 'x, -y-1/2, z-1/2' 
  
_cell_length_a                    11.8337(13) 
_cell_length_b                    17.2263(18) 
_cell_length_c                    9.9628(10) 
_cell_angle_alpha                 90.00 
_cell_angle_beta                  106.880(2) 
_cell_angle_gamma                 90.00 
_cell_volume                      1943.4(4) 
_cell_formula_units_Z             4 
_cell_measurement_temperature     293(2) 
_cell_measurement_reflns_used     2202 
_cell_measurement_theta_min       4.729 
_cell_measurement_theta_max       42.032 
  
_exptl_crystal_description        ? 
_exptl_crystal_colour             colorless 
_exptl_crystal_size_max           0.516 
_exptl_crystal_size_mid           0.354 
_exptl_crystal_size_min           0.220 
_exptl_crystal_density_meas       ? 
_exptl_crystal_density_diffrn     1.324 
_exptl_crystal_density_method     'not measured' 
_exptl_crystal_F_000              816 
_exptl_absorpt_coefficient_mu     0.197 
_exptl_absorpt_correction_type    empirical 
_exptl_absorpt_correction_T_min   0.60697 
_exptl_absorpt_correction_T_max   1.00000 
_exptl_absorpt_process_details    ? 
  
_exptl_special_details 
; 
 ? 
; 
  
_diffrn_ambient_temperature       293(2) 
_diffrn_radiation_wavelength      0.71073 
_diffrn_radiation_type            MoK\a 
_diffrn_radiation_source          'fine-focus sealed tube' 
_diffrn_radiation_monochromator   graphite 
_diffrn_measurement_device_type   'CCD area detector' 
_diffrn_measurement_method        'phi and omega scans' 
_diffrn_detector_area_resol_mean  ? 
_diffrn_standards_number          ? 
_diffrn_standards_interval_count  ? 
_diffrn_standards_interval_time   ? 
_diffrn_standards_decay_%         ? 
_diffrn_reflns_number             10931 
_diffrn_reflns_av_R_equivalents   0.1340 
_diffrn_reflns_av_sigmaI/netI     0.1043 
_diffrn_reflns_limit_h_min        -14 
_diffrn_reflns_limit_h_max        13 
_diffrn_reflns_limit_k_min        -17 
_diffrn_reflns_limit_k_max        21 
_diffrn_reflns_limit_l_min        -12 
_diffrn_reflns_limit_l_max        12 
_diffrn_reflns_theta_min          1.80 
_diffrn_reflns_theta_max          26.50 
_reflns_number_total              4005 
_reflns_number_gt                 2273 
_reflns_threshold_expression      >2sigma(I) 
  
_computing_data_collection        'Bruker SMART' 
_computing_cell_refinement        'Bruker SMART' 
_computing_data_reduction         'Bruker SHELXTL' 
_computing_structure_solution     'SHELXS-97 (Sheldrick, 1990)' 
_computing_structure_refinement   'SHELXL-97 (Sheldrick, 1997)' 
_computing_molecular_graphics     'Bruker SHELXTL' 
_computing_publication_material   'Bruker SHELXTL' 
  
_refine_special_details 
; 
 Refinement of F^2^ against ALL reflections.  The weighted R-factor wR and 
 goodness of fit S are based on F^2^, conventional R-factors R are based 
 on F, with F set to zero for negative F^2^. The threshold expression of 
 F^2^ > 2sigma(F^2^) is used only for calculating R-factors(gt) etc. and is 
 not relevant to the choice of reflections for refinement.  R-factors based 
 on F^2^ are statistically about twice as large as those based on F, and R- 
 factors based on ALL data will be even larger. 
; 
  
_refine_ls_structure_factor_coef  Fsqd 
_refine_ls_matrix_type            full 
_refine_ls_weighting_scheme       calc 
_refine_ls_weighting_details 
 'calc w=1/[\s^2^(Fo^2^)+(0.0829P)^2^+0.0000P] where P=(Fo^2^+2Fc^2^)/3' 
_atom_sites_solution_primary      direct 
_atom_sites_solution_secondary    difmap 
_atom_sites_solution_hydrogens    geom 
_refine_ls_hydrogen_treatment     mixed 
_refine_ls_extinction_method      none 
_refine_ls_extinction_coef        ? 
_refine_ls_number_reflns          4005 
_refine_ls_number_parameters      287 
_refine_ls_number_restraints      0 
_refine_ls_R_factor_all           0.1008 
_refine_ls_R_factor_gt            0.0642 
_refine_ls_wR_factor_ref          0.1801 
_refine_ls_wR_factor_gt           0.1617 
_refine_ls_goodness_of_fit_ref    0.921 
_refine_ls_restrained_S_all       0.921 
_refine_ls_shift/su_max           0.075 
_refine_ls_shift/su_mean          0.003 
  
loop_ 
 _atom_site_label 
 _atom_site_type_symbol 
 _atom_site_fract_x 
 _atom_site_fract_y 
 _atom_site_fract_z 
 _atom_site_U_iso_or_equiv 
 _atom_site_adp_type 
 _atom_site_occupancy 
 _atom_site_symmetry_multiplicity 
 _atom_site_calc_flag 
 _atom_site_refinement_flags 
 _atom_site_disorder_assembly 
 _atom_site_disorder_group 
S1 S 0.39381(6) 1.04645(4) 0.28507(7) 0.0664(3) Uani 1 1 d . . . 
O1 O 0.14365(18) 0.97493(12) 0.6393(2) 0.0819(6) Uani 1 1 d . . . 
O2 O 0.31799(19) 1.10553(11) 0.2064(2) 0.0828(7) Uani 1 1 d . . . 
O3 O 0.51268(17) 1.06638(13) 0.3634(2) 0.0773(6) Uani 1 1 d . . . 
O4 O 0.1241(2) 0.91773(15) 0.1807(3) 0.1038(9) Uani 1 1 d . . . 
O5 O 0.1512(2) 0.81433(15) 0.3182(3) 0.1311(11) Uani 1 1 d . . . 
N1 N 0.3344(2) 1.01118(15) 0.3948(3) 0.0654(7) Uani 1 1 d . . . 
C1 C 0.2023(2) 1.07593(15) 0.5057(3) 0.0601(7) Uani 1 1 d . . . 
C2 C 0.2295(3) 1.15387(18) 0.4989(4) 0.0776(9) Uani 1 1 d . . . 
C3 C 0.2241(3) 1.2043(2) 0.6047(5) 0.0932(12) Uani 1 1 d . . . 
C4 C 0.1889(3) 1.1778(3) 0.7145(5) 0.0976(12) Uani 1 1 d . . . 
C5 C 0.1622(3) 1.1008(2) 0.7257(4) 0.0833(10) Uani 1 1 d . . . 
C6 C 0.1702(2) 1.05142(17) 0.6200(3) 0.0666(8) Uani 1 1 d . . . 
C7 C 0.1395(2) 0.92243(17) 0.5356(4) 0.0749(9) Uani 1 1 d . . . 
C8 C 0.1628(2) 0.94133(15) 0.4174(4) 0.0670(8) Uani 1 1 d . . . 
C9 C 0.2105(2) 1.01985(16) 0.3951(3) 0.0606(7) Uani 1 1 d . . . 
C10 C 0.1025(3) 0.84615(19) 0.5790(4) 0.1056(13) Uani 1 1 d . . . 
H10A H 0.0893 0.8101 0.5025 0.128 Uiso 1 1 calc R . . 
H10B H 0.0309 0.8525 0.6047 0.128 Uiso 1 1 calc R . . 
H10C H 0.1634 0.8266 0.6579 0.128 Uiso 1 1 calc R . . 
C11 C 0.1474(3) 0.8836(2) 0.3044(5) 0.0891(11) Uani 1 1 d . . . 
C12 C 0.1054(4) 0.8678(3) 0.0591(5) 0.129(2) Uani 1 1 d . . . 
H12A H 0.1724 0.8732 0.0222 0.138 Uiso 1 1 calc R . . 
H12B H 0.1038 0.8143 0.0893 0.138 Uiso 1 1 calc R . . 
C13 C 0.0108(5) 0.8808(4) -0.0406(5) 0.126(3) Uani 1 1 d . . . 
H13A H -0.0554 0.8825 -0.0033 0.139 Uiso 1 1 calc R . . 
H13B H -0.0007 0.8400 -0.1089 0.139 Uiso 1 1 calc R . . 
H13C H 0.0177 0.9296 -0.0841 0.139 Uiso 1 1 calc R . . 
C14 C 0.4043(2) 0.97228(17) 0.1693(3) 0.0653(8) Uani 1 1 d . . . 
C15 C 0.4633(3) 0.9047(2) 0.2215(4) 0.0831(10) Uani 1 1 d . . . 
C16 C 0.4734(3) 0.8471(2) 0.1319(4) 0.0899(11) Uani 1 1 d . . . 
C17 C 0.4257(3) 0.8535(2) -0.0117(4) 0.0810(9) Uani 1 1 d . . . 
C18 C 0.3698(3) 0.9226(3) -0.0622(4) 0.0977(12) Uani 1 1 d . . . 
C19 C 0.3592(3) 0.9813(2) 0.0268(3) 0.0883(10) Uani 1 1 d . . . 
C20 C 0.4345(3) 0.7885(3) -0.1091(4) 0.1155(13) Uani 1 1 d . . . 
H20A H 0.3924 0.7441 -0.0909 0.133 Uiso 1 1 calc R . . 
H20B H 0.5160 0.7752 -0.0942 0.133 Uiso 1 1 calc R . . 
H20C H 0.4008 0.8049 -0.2045 0.133 Uiso 1 1 calc R . . 
H1 H 0.375(2) 0.9938(15) 0.463(3) 0.053(8) Uiso 1 1 d . . . 
H2 H 0.263(3) 1.1665(19) 0.426(3) 0.089(11) Uiso 1 1 d . . . 
H3 H 0.240(3) 1.256(2) 0.582(3) 0.096(11) Uiso 1 1 d . . . 
H4 H 0.174(3) 1.213(2) 0.790(4) 0.109(11) Uiso 1 1 d . . . 
H5 H 0.136(3) 1.0883(18) 0.807(3) 0.080(10) Uiso 1 1 d . . . 
H9 H 0.173(2) 1.0359(16) 0.312(3) 0.069(9) Uiso 1 1 d . . . 
H15 H 0.494(2) 0.8941(17) 0.315(3) 0.081(9) Uiso 1 1 d . . . 
H16 H 0.511(3) 0.800(2) 0.166(4) 0.117(13) Uiso 1 1 d . . . 
H18 H 0.348(2) 0.9299(17) -0.162(3) 0.078(9) Uiso 1 1 d . . . 
H19 H 0.310(3) 1.035(2) -0.010(4) 0.120(12) Uiso 1 1 d . . . 
  
loop_ 
 _atom_site_aniso_label 
 _atom_site_aniso_U_11 
 _atom_site_aniso_U_22 
 _atom_site_aniso_U_33 
 _atom_site_aniso_U_23 
 _atom_site_aniso_U_13 
 _atom_site_aniso_U_12 
S1 0.0683(5) 0.0549(5) 0.0644(5) 0.0116(3) 0.0010(3) 0.0048(3) 
O1 0.0886(15) 0.0606(14) 0.0859(14) 0.0133(12) 0.0088(11) 0.0002(11) 
O2 0.0957(15) 0.0585(13) 0.0800(13) 0.0241(10) 0.0031(11) 0.0205(10) 
O3 0.0696(13) 0.0737(14) 0.0749(12) 0.0105(10) -0.0006(10) -0.0136(10) 
O4 0.0975(17) 0.0810(18) 0.1055(18) -0.0407(15) -0.0139(14) 0.0168(12) 
O5 0.136(2) 0.0484(16) 0.195(3) -0.0352(17) 0.026(2) 0.0055(14) 
N1 0.0605(15) 0.0658(16) 0.0593(14) 0.0132(12) 0.0004(12) 0.0125(11) 
C1 0.0522(15) 0.0432(16) 0.0717(18) -0.0042(13) -0.0027(13) 0.0010(11) 
C2 0.076(2) 0.0500(19) 0.099(2) -0.0081(18) 0.0126(18) -0.0022(14) 
C3 0.094(3) 0.049(2) 0.122(3) -0.021(2) 0.008(2) -0.0058(18) 
C4 0.095(3) 0.089(3) 0.096(3) -0.037(3) 0.005(2) 0.006(2) 
C5 0.080(2) 0.084(3) 0.077(2) -0.009(2) 0.0088(18) 0.0093(18) 
C6 0.0548(16) 0.0546(18) 0.0769(19) -0.0015(16) -0.0021(14) 0.0056(12) 
C7 0.0593(18) 0.0475(18) 0.101(2) 0.0053(18) -0.0038(17) 0.0052(13) 
C8 0.0497(15) 0.0407(16) 0.095(2) -0.0048(15) -0.0031(15) 0.0050(11) 
C9 0.0532(16) 0.0480(17) 0.0669(18) -0.0007(14) -0.0042(13) 0.0055(12) 
C10 0.093(2) 0.053(2) 0.152(3) 0.025(2) 0.005(2) -0.0083(17) 
C11 0.0551(18) 0.060(2) 0.134(3) -0.031(2) -0.0027(18) 0.0083(14) 
C12 0.121(3) 0.137(4) 0.150(4) -0.098(3) -0.020(3) 0.033(3) 
C13 0.173(5) 0.240(7) 0.102(3) -0.076(4) -0.029(3) 0.087(5) 
C14 0.0582(16) 0.0660(19) 0.0628(17) 0.0096(14) 0.0033(13) 0.0049(13) 
C15 0.106(3) 0.067(2) 0.068(2) 0.0120(18) 0.0101(18) 0.0141(18) 
C16 0.103(3) 0.068(2) 0.099(3) 0.007(2) 0.029(2) 0.0149(19) 
C17 0.072(2) 0.087(3) 0.084(2) -0.013(2) 0.0236(17) -0.0079(17) 
C18 0.087(2) 0.128(4) 0.065(2) -0.006(2) 0.0015(18) 0.011(2) 
C19 0.088(2) 0.097(3) 0.0642(19) 0.0027(19) -0.0023(16) 0.0218(19) 
C20 0.111(3) 0.117(3) 0.125(3) -0.038(3) 0.046(2) -0.013(2) 
  
_geom_special_details 
; 
 All esds (except the esd in the dihedral angle between two l.s. planes) 
 are estimated using the full covariance matrix.  The cell esds are taken 
 into account individually in the estimation of esds in distances, angles 
 and torsion angles; correlations between esds in cell parameters are only 
 used when they are defined by crystal symmetry.  An approximate (isotropic) 
 treatment of cell esds is used for estimating esds involving l.s. planes. 
; 
  
loop_ 
 _geom_bond_atom_site_label_1 
 _geom_bond_atom_site_label_2 
 _geom_bond_distance 
 _geom_bond_site_symmetry_2 
 _geom_bond_publ_flag 
S1 O2 1.4305(18) . ? 
S1 O3 1.4381(18) . ? 
S1 N1 1.583(3) . ? 
S1 C14 1.750(3) . ? 
O1 C7 1.363(4) . ? 
O1 C6 1.381(3) . ? 
O4 C11 1.321(4) . ? 
O4 C12 1.450(4) . ? 
O5 C11 1.200(4) . ? 
N1 C9 1.474(4) . ? 
N1 H1 0.77(3) . ? 
C1 C6 1.367(4) . ? 
C1 C2 1.387(4) . ? 
C1 C9 1.490(4) . ? 
C2 C3 1.382(5) . ? 
C2 H2 0.95(3) . ? 
C3 C4 1.358(6) . ? 
C3 H3 0.95(3) . ? 
C4 C5 1.374(6) . ? 
C4 H4 1.02(4) . ? 
C5 C6 1.379(5) . ? 
C5 H5 0.97(3) . ? 
C7 C8 1.326(4) . ? 
C7 C10 1.488(4) . ? 
C8 C11 1.474(4) . ? 
C8 C9 1.507(4) . ? 
C9 H9 0.87(3) . ? 
C10 H10A 0.9600 . ? 
C10 H10B 0.9600 . ? 
C10 H10C 0.9600 . ? 
C12 C13 1.282(5) . ? 
C12 H12A 0.9700 . ? 
C12 H12B 0.9700 . ? 
C13 H13A 0.9600 . ? 
C13 H13B 0.9600 . ? 
C13 H13C 0.9600 . ? 
C14 C19 1.372(4) . ? 
C14 C15 1.379(4) . ? 
C15 C16 1.363(5) . ? 
C15 H15 0.92(3) . ? 
C16 C17 1.381(5) . ? 
C16 H16 0.94(4) . ? 
C17 C18 1.384(5) . ? 
C17 C20 1.505(5) . ? 
C18 C19 1.375(5) . ? 
C18 H18 0.96(3) . ? 
C19 H19 1.09(4) . ? 
C20 H20A 0.9600 . ? 
C20 H20B 0.9600 . ? 
C20 H20C 0.9600 . ? 
  
loop_ 
 _geom_angle_atom_site_label_1 
 _geom_angle_atom_site_label_2 
 _geom_angle_atom_site_label_3 
 _geom_angle 
 _geom_angle_site_symmetry_1 
 _geom_angle_site_symmetry_3 
 _geom_angle_publ_flag 
O2 S1 O3 119.12(13) . . ? 
O2 S1 N1 108.54(14) . . ? 
O3 S1 N1 106.10(12) . . ? 
O2 S1 C14 108.13(12) . . ? 
O3 S1 C14 106.67(14) . . ? 
N1 S1 C14 107.81(14) . . ? 
C7 O1 C6 119.1(3) . . ? 
C11 O4 C12 117.1(3) . . ? 
C9 N1 S1 127.1(2) . . ? 
C9 N1 H1 114(2) . . ? 
S1 N1 H1 118(2) . . ? 
C6 C1 C2 117.6(3) . . ? 
C6 C1 C9 120.6(3) . . ? 
C2 C1 C9 121.7(3) . . ? 
C3 C2 C1 120.6(4) . . ? 
C3 C2 H2 124(2) . . ? 
C1 C2 H2 114(2) . . ? 
C4 C3 C2 119.7(4) . . ? 
C4 C3 H3 129(2) . . ? 
C2 C3 H3 111(2) . . ? 
C3 C4 C5 121.4(4) . . ? 
C3 C4 H4 123(2) . . ? 
C5 C4 H4 115(2) . . ? 
C4 C5 C6 117.7(4) . . ? 
C4 C5 H5 114.7(19) . . ? 
C6 C5 H5 127.5(19) . . ? 
C1 C6 C5 122.9(3) . . ? 
C1 C6 O1 122.7(3) . . ? 
C5 C6 O1 114.4(3) . . ? 
C8 C7 O1 122.6(3) . . ? 
C8 C7 C10 129.0(3) . . ? 
O1 C7 C10 108.3(3) . . ? 
C7 C8 C11 120.1(3) . . ? 
C7 C8 C9 122.3(3) . . ? 
C11 C8 C9 117.5(3) . . ? 
N1 C9 C1 110.2(2) . . ? 
N1 C9 C8 108.9(2) . . ? 
C1 C9 C8 111.4(3) . . ? 
N1 C9 H9 105.0(19) . . ? 
C1 C9 H9 112.3(18) . . ? 
C8 C9 H9 108.7(19) . . ? 
C7 C10 H10A 109.5 . . ? 
C7 C10 H10B 109.5 . . ? 
H10A C10 H10B 109.5 . . ? 
C7 C10 H10C 109.5 . . ? 
H10A C10 H10C 109.5 . . ? 
H10B C10 H10C 109.5 . . ? 
O5 C11 O4 122.7(4) . . ? 
O5 C11 C8 126.3(4) . . ? 
O4 C11 C8 111.0(3) . . ? 
C13 C12 O4 115.5(4) . . ? 
C13 C12 H12A 108.4 . . ? 
O4 C12 H12A 108.4 . . ? 
C13 C12 H12B 108.4 . . ? 
O4 C12 H12B 108.4 . . ? 
H12A C12 H12B 107.5 . . ? 
C12 C13 H13A 109.5 . . ? 
C12 C13 H13B 109.5 . . ? 
H13A C13 H13B 109.5 . . ? 
C12 C13 H13C 109.5 . . ? 
H13A C13 H13C 109.5 . . ? 
H13B C13 H13C 109.5 . . ? 
C19 C14 C15 119.2(3) . . ? 
C19 C14 S1 121.2(3) . . ? 
C15 C14 S1 119.5(2) . . ? 
C16 C15 C14 119.9(3) . . ? 
C16 C15 H15 115.9(19) . . ? 
C14 C15 H15 124.1(19) . . ? 
C15 C16 C17 122.2(4) . . ? 
C15 C16 H16 121(2) . . ? 
C17 C16 H16 117(2) . . ? 
C16 C17 C18 117.0(4) . . ? 
C16 C17 C20 121.7(4) . . ? 
C18 C17 C20 121.4(3) . . ? 
C19 C18 C17 121.5(3) . . ? 
C19 C18 H18 121.6(19) . . ? 
C17 C18 H18 116.5(19) . . ? 
C14 C19 C18 120.2(4) . . ? 
C14 C19 H19 116.7(19) . . ? 
C18 C19 H19 123.0(19) . . ? 
C17 C20 H20A 109.5 . . ? 
C17 C20 H20B 109.5 . . ? 
H20A C20 H20B 109.5 . . ? 
C17 C20 H20C 109.5 . . ? 
H20A C20 H20C 109.5 . . ? 
H20B C20 H20C 109.5 . . ? 
  
loop_ 
 _geom_torsion_atom_site_label_1 
 _geom_torsion_atom_site_label_2 
 _geom_torsion_atom_site_label_3 
 _geom_torsion_atom_site_label_4 
 _geom_torsion 
 _geom_torsion_site_symmetry_1 
 _geom_torsion_site_symmetry_2 
 _geom_torsion_site_symmetry_3 
 _geom_torsion_site_symmetry_4 
 _geom_torsion_publ_flag 
O2 S1 N1 C9 15.4(3) . . . . ? 
O3 S1 N1 C9 144.6(2) . . . . ? 
C14 S1 N1 C9 -101.5(3) . . . . ? 
C6 C1 C2 C3 0.0(4) . . . . ? 
C9 C1 C2 C3 -178.3(3) . . . . ? 
C1 C2 C3 C4 -1.7(5) . . . . ? 
C2 C3 C4 C5 2.3(6) . . . . ? 
C3 C4 C5 C6 -1.2(5) . . . . ? 
C2 C1 C6 C5 1.2(4) . . . . ? 
C9 C1 C6 C5 179.5(3) . . . . ? 
C2 C1 C6 O1 -178.6(2) . . . . ? 
C9 C1 C6 O1 -0.3(4) . . . . ? 
C4 C5 C6 C1 -0.6(5) . . . . ? 
C4 C5 C6 O1 179.2(3) . . . . ? 
C7 O1 C6 C1 -5.5(4) . . . . ? 
C7 O1 C6 C5 174.7(2) . . . . ? 
C6 O1 C7 C8 1.6(4) . . . . ? 
C6 O1 C7 C10 -176.7(2) . . . . ? 
O1 C7 C8 C11 -175.0(2) . . . . ? 
C10 C7 C8 C11 3.0(5) . . . . ? 
O1 C7 C8 C9 7.9(4) . . . . ? 
C10 C7 C8 C9 -174.1(3) . . . . ? 
S1 N1 C9 C1 -104.8(3) . . . . ? 
S1 N1 C9 C8 132.7(3) . . . . ? 
C6 C1 C9 N1 -112.6(3) . . . . ? 
C2 C1 C9 N1 65.6(3) . . . . ? 
C6 C1 C9 C8 8.5(3) . . . . ? 
C2 C1 C9 C8 -173.3(2) . . . . ? 
C7 C8 C9 N1 109.5(3) . . . . ? 
C11 C8 C9 N1 -67.8(3) . . . . ? 
C7 C8 C9 C1 -12.4(4) . . . . ? 
C11 C8 C9 C1 170.4(2) . . . . ? 
C12 O4 C11 O5 -1.5(5) . . . . ? 
C12 O4 C11 C8 -179.3(3) . . . . ? 
C7 C8 C11 O5 -25.0(5) . . . . ? 
C9 C8 C11 O5 152.3(3) . . . . ? 
C7 C8 C11 O4 152.7(3) . . . . ? 
C9 C8 C11 O4 -30.0(3) . . . . ? 
C11 O4 C12 C13 128.9(6) . . . . ? 
O2 S1 C14 C19 9.2(3) . . . . ? 
O3 S1 C14 C19 -120.1(3) . . . . ? 
N1 S1 C14 C19 126.3(3) . . . . ? 
O2 S1 C14 C15 -173.7(3) . . . . ? 
O3 S1 C14 C15 57.1(3) . . . . ? 
N1 S1 C14 C15 -56.5(3) . . . . ? 
C19 C14 C15 C16 -1.8(5) . . . . ? 
S1 C14 C15 C16 -179.0(3) . . . . ? 
C14 C15 C16 C17 -0.3(6) . . . . ? 
C15 C16 C17 C18 2.1(6) . . . . ? 
C15 C16 C17 C20 -178.2(3) . . . . ? 
C16 C17 C18 C19 -1.9(6) . . . . ? 
C20 C17 C18 C19 178.5(4) . . . . ? 
C15 C14 C19 C18 2.0(6) . . . . ? 
S1 C14 C19 C18 179.1(3) . . . . ? 
C17 C18 C19 C14 -0.1(6) . . . . ? 
  
loop_ 
 _geom_hbond_atom_site_label_D 
 _geom_hbond_atom_site_label_H 
 _geom_hbond_atom_site_label_A 
 _geom_hbond_distance_DH 
 _geom_hbond_distance_HA 
 _geom_hbond_distance_DA 
 _geom_hbond_angle_DHA 
 _geom_hbond_site_symmetry_A 
N1 H1 O3  0.77(3) 2.12(3) 2.886(3) 173(3) 3_676 
  
_diffrn_measured_fraction_theta_max    0.996 
_diffrn_reflns_theta_full              26.50 
_diffrn_measured_fraction_theta_full   0.996 
_refine_diff_density_max    0.293 
_refine_diff_density_min   -0.226 
_refine_diff_density_rms    0.056 
  
